# Supplementary material
Source: PubMed Central journal article supplement (PMC3857963)
Supplement: NIHMS518837-supplement-1.pdf [file NIHMS518837-supplement-1.pdf]

Online Resource 1: Frequencies of class II alleles are shown for the total cohort, as well as, cases and controls.

| <b>DRB1*</b>  | <b>Total No.<br/>(2n=350)</b> | <b>(%)</b> | <b>Case No.<br/>(2n=194)</b> | <b>(%)</b> | <b>Control No.<br/>(2n=156)</b> | <b>(%)</b> |
|---------------|-------------------------------|------------|------------------------------|------------|---------------------------------|------------|
| <b>001:01</b> | 14                            | 4.0        | 7                            | 3.6        | 7                               | 4.5        |
| <b>001:02</b> | 31                            | 8.9        | 11                           | 5.7        | 20                              | 12.8       |
| <b>002:01</b> | 11                            | 3.1        | 3                            | 1.5        | 8                               | 5.1        |
| <b>006:01</b> | 5                             | 1.4        | 5                            | 2.6        | 0                               | 0.0        |
| <b>011:01</b> | 153                           | 43.7       | 96                           | 49.5       | 57                              | 36.5       |
| <b>012:01</b> | 21                            | 6.0        | 20                           | 10.3       | 1                               | 0.6        |
| <b>013:01</b> | 1                             | 0.3        | 1                            | 0.5        | 0                               | 0.0        |
| <b>015:01</b> | 99                            | 28.3       | 43                           | 22.2       | 56                              | 35.9       |
| <b>015:02</b> | 8                             | 2.3        | 3                            | 1.5        | 5                               | 3.2        |
| <b>016:01</b> | 1                             | 0.3        | 0                            | 0.0        | 1                               | 0.6        |
| <b>020:01</b> | 5                             | 1.4        | 4                            | 2.1        | 1                               | 0.6        |
| <b>040:01</b> | 1                             | 0.3        | 1                            | 0.5        | 0                               | 0.0        |

| <b>DQA1*</b>    | <b>Total No.<br/>(2n=350)</b> | <b>(%)</b> | <b>Case No.<br/>(2n=194)</b> | <b>(%)</b> | <b>Control No.<br/>(2n=156)</b> | <b>(%)</b> |
|-----------------|-------------------------------|------------|------------------------------|------------|---------------------------------|------------|
| <b>001:01</b>   | 46                            | 13.1       | 18                           | 9.3        | 28                              | 17.9       |
| <b>002:01</b>   | 153                           | 43.7       | 96                           | 49.5       | 57                              | 36.5       |
| <b>003:01</b>   | 1                             | 0.3        | 1                            | 0.5        | 0                               | 0.0        |
| <b>004:01</b>   | 26                            | 7.4        | 24                           | 12.4       | 2                               | 1.3        |
| <b>005:01:1</b> | 5                             | 1.4        | 5                            | 2.6        | 0                               | 0.0        |
| <b>006:01</b>   | 107                           | 30.6       | 46                           | 23.7       | 61                              | 39.1       |
| <b>009:01</b>   | 11                            | 3.1        | 3                            | 1.5        | 8                               | 5.1        |
| <b>010:01</b>   | 1                             | 0.3        | 1                            | 0.5        | 0                               | 0.0        |

| <b>DQB1*</b>                     | <b>Total No.<br/>(2n=350)</b> | <b>(%)</b> | <b>Case No.<br/>(2n=194)</b> | <b>(%)</b> | <b>Control No.<br/>(2n=156)</b> | <b>(%)</b> |
|----------------------------------|-------------------------------|------------|------------------------------|------------|---------------------------------|------------|
| <b>001:01</b>                    | 11                            | 3.1        | 3                            | 1.5        | 8                               | 5.1        |
| <b>002:01</b>                    | 46                            | 13.1       | 18                           | 9.3        | 28                              | 17.9       |
| <b>003:01</b>                    | 96                            | 27.4       | 42                           | 21.6       | 54                              | 34.6       |
| <b>005:02</b>                    | 1                             | 0.3        | 1                            | 0.5        | 0                               | 0.0        |
| <b>007:01</b>                    | 5                             | 1.4        | 5                            | 2.6        | 0                               | 0.0        |
| <b>013:02</b>                    | 150                           | 42.9       | 96                           | 49.5       | 54                              | 34.6       |
| <b>013:03</b>                    | 8                             | 2.3        | 4                            | 2.1        | 4                               | 2.6        |
| <b>019:01</b>                    | 1                             | 0.3        | 1                            | 0.5        | 0                               | 0.0        |
| <b>020:02</b>                    | 1                             | 0.3        | 1                            | 0.5        | 0                               | 0.0        |
| <b>023:01</b>                    | 10                            | 2.9        | 3                            | 1.5        | 7                               | 4.5        |
| <b>013:01+017:01<sup>a</sup></b> | 21                            | 6.0        | 20                           | 10.3       | 1                               | 0.6        |

<sup>a</sup> 013:01+017:01 indicates that DQB1\*013:03 and DQB1\*017:01 are both present on the same haplotype.

Tsai KL, Starr-Moss AN, Venkataraman GM, Robinson C, Kennedy LJ, Steiner JM, Clark LA. Alleles of the major histocompatibility complex play a role in the pathogenesis of pancreatic acinar atrophy in dogs. Immunogenetics

Corresponding author:

Leigh Anne Clark

E-mail: [lclark4@clemson.edu](mailto:lclark4@clemson.edu)

Department of Genetics and Biochemistry, College of Agriculture, Forestry and Life Sciences, Clemson University, Clemson, SC, USA
